# Supplementary material for: Design and growth of dendritic Cu2−xSe and bunchy CuSe hierarchical crystalline aggregations
Source: Royal Society of Chemistry journal article supplement (doi:10.1039/b919087m), 2010-01-01

**Supporting Information for**  
**Design and Growth of Dendritic Cu<sub>2-x</sub>Se and Bunchy CuSe Hierarchical**  
**Crystalline Aggregations**

Dapeng Li,<sup>a</sup> Zhi Zheng,<sup>\*a</sup> Yan Lei,<sup>a</sup> Suxiang Ge,<sup>ab</sup> Yidong Zhang,<sup>a</sup> Yange Zhang,<sup>a</sup> Ka

Wai Wong,<sup>a</sup> and Woon Ming Lau<sup>c</sup>

<sup>a</sup>*Institute of Surface Micro and Nano Materials, Xuchang University, Xuchang, 461000, China. E-mail: [zhengzhi9999@yahoo.com.cn](mailto:zhengzhi9999@yahoo.com.cn); Phone and Fax: +86 374 4369209*

<sup>b</sup>*Key Laboratory of Pesticide & Chemical Biology of Ministry of Education, College of Chemistry, Central China Normal University, Wuhan, 430079, China*

<sup>c</sup>*Surface Science Western, The University of Western Ontario, London, Canada*

**Fig. 1** SEM morphologies of crystalline CdSe nanodendrites fabricated at 220 °C for 24h in Se/ethanol solvothermal system with a CTAB dosage of 0.02g.

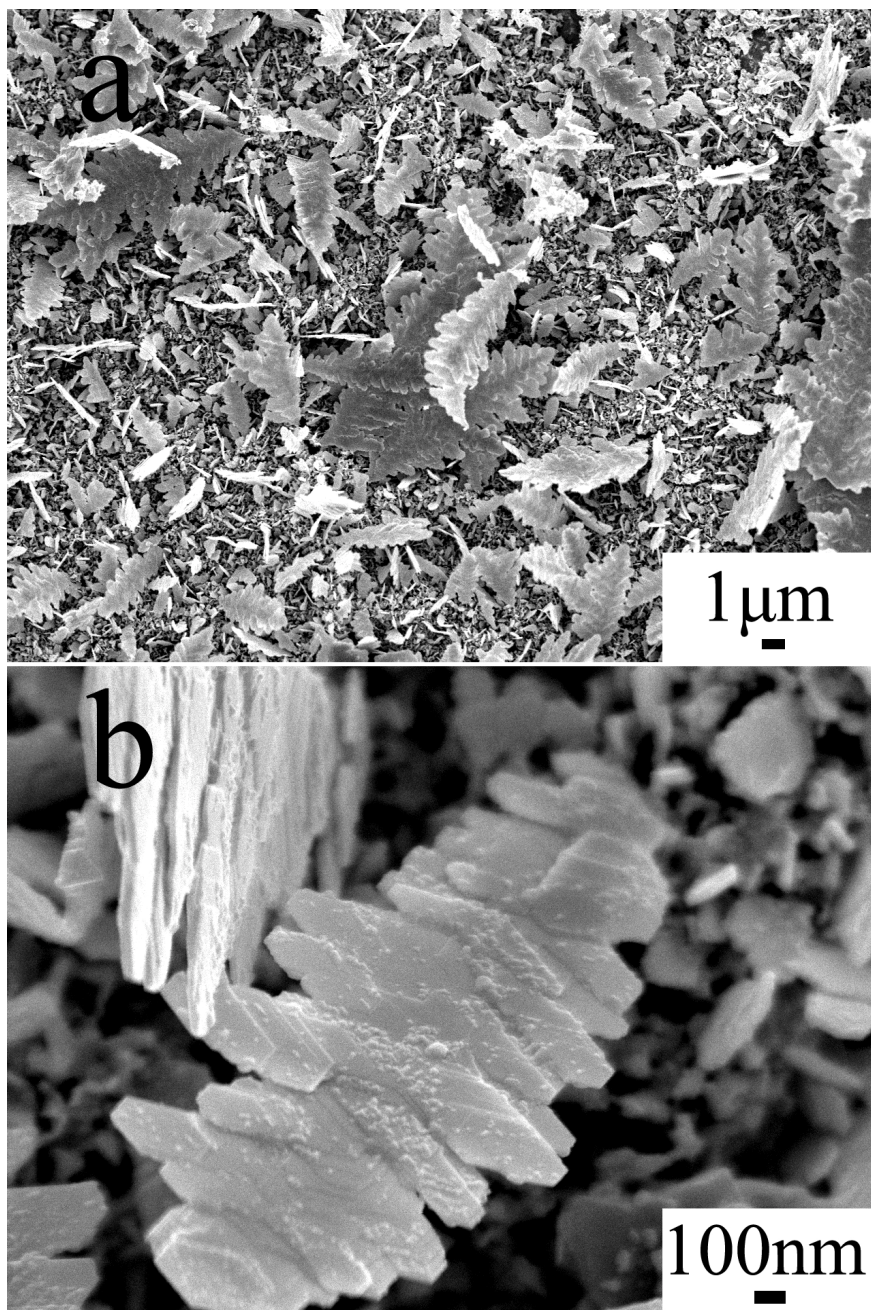

Supplement: b919087m.pdf [file b919087m.pdf]
